# Supplementary material for: Short-term fate of intertidal microphytobenthos carbon under enhanced nutrient availability: a 13 C pulse-chase experiment
Source: Copernicus journal article supplement (doi:10.5194/bg-15-2873-2018), 2018-05-16
Supplement: Supplementary file 1 [file bg-15-2873-2018-supplement.pdf]

Supplement of Biogeosciences, 15, 2873–2889, 2018  
<https://doi.org/10.5194/bg-15-2873-2018-supplement>  
© Author(s) 2018. This work is distributed under  
the Creative Commons Attribution 4.0 License.

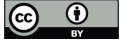

*Supplement of*

## **Short-term fate of intertidal microphytobenthos carbon under enhanced nutrient availability: a $^{13}\text{C}$ pulse-chase experiment**

**Philip M. Riekenberg et al.**

*Correspondence to:* Philip M. Riekenberg (phrieken@gmail.com)

The copyright of individual parts of the supplement might differ from the CC BY 4.0 License.

1

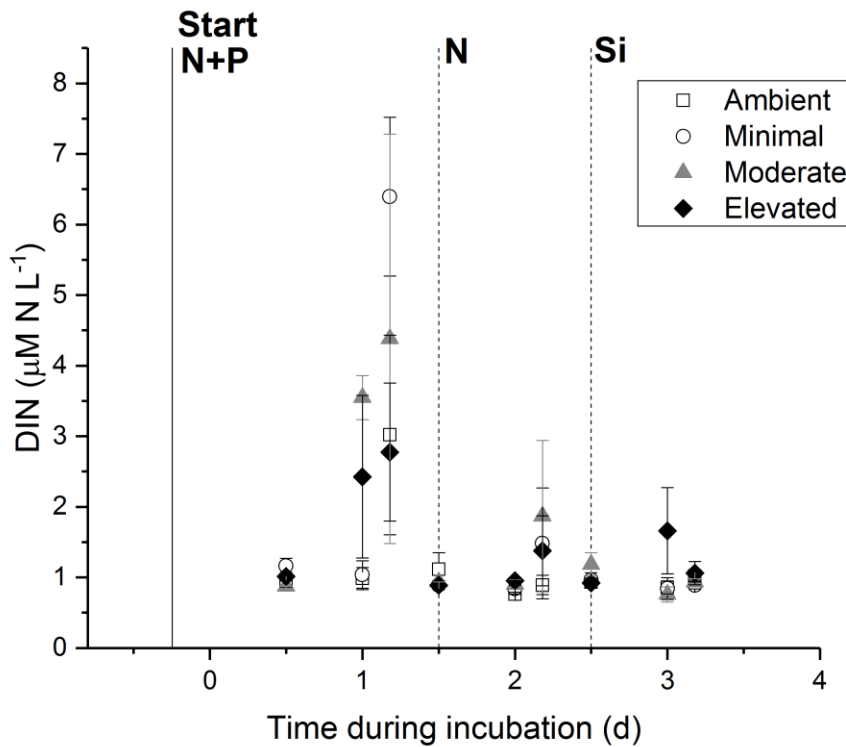

2

3

4 **Supplemental Figure 1:** Dissolved inorganic nitrogen in the overlying core waters during  
5 sampling for light and dark incubations. The y-axis intercept represents the initial application of  
6  $\text{H}^{13}\text{CO}_3$  to the sediment. The solid line is when cores were placed into treatment tanks prior to  
7 the start of incubation. Dashed lines represent additional treatment pulses ( $\text{N}=\text{NH}_4^+$ ,  $\text{P}=\text{PO}_4^{3-}$ ,  
8  $\text{Si}=\text{SiO}_3$ ) that occurred during incubation.

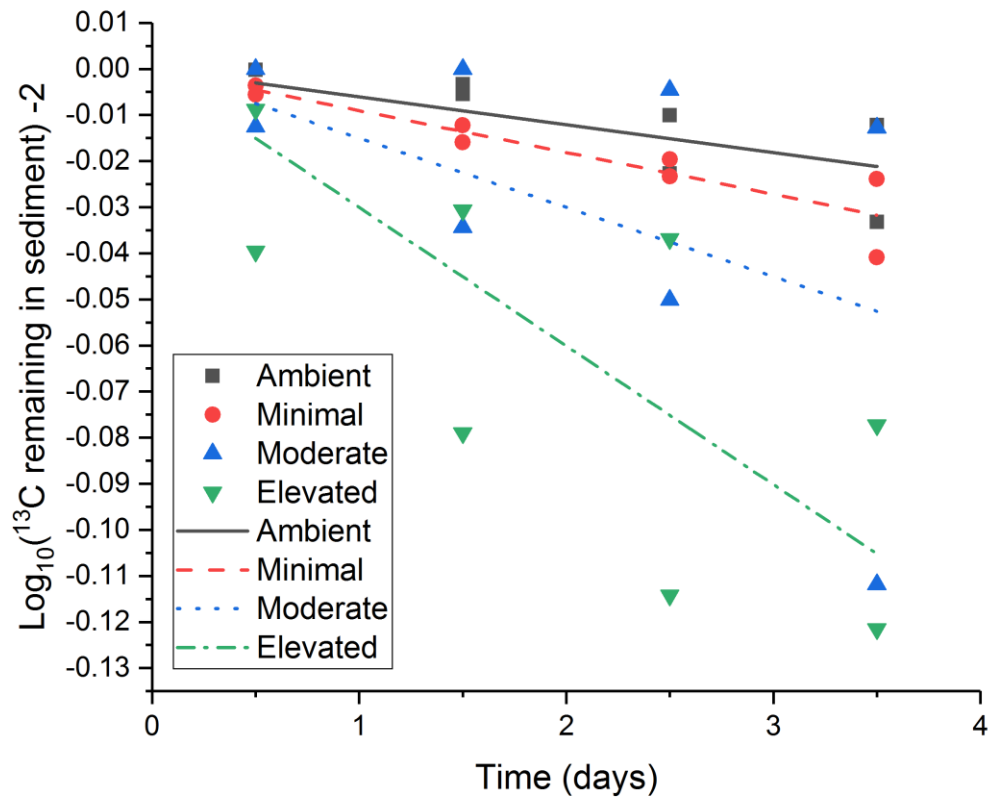

9

10 **Supplemental Figure 2:** Slope comparison between treatments for  $\log_{10}$  transformed  $^{13}\text{C}$   
 11 remaining in sediment. The model with different slopes for each treatment fitted significantly  
 12 better than the model with a single slope (F-test,  $F_{3,28}=9.84$ ,  $P < 0.001$ ).

13

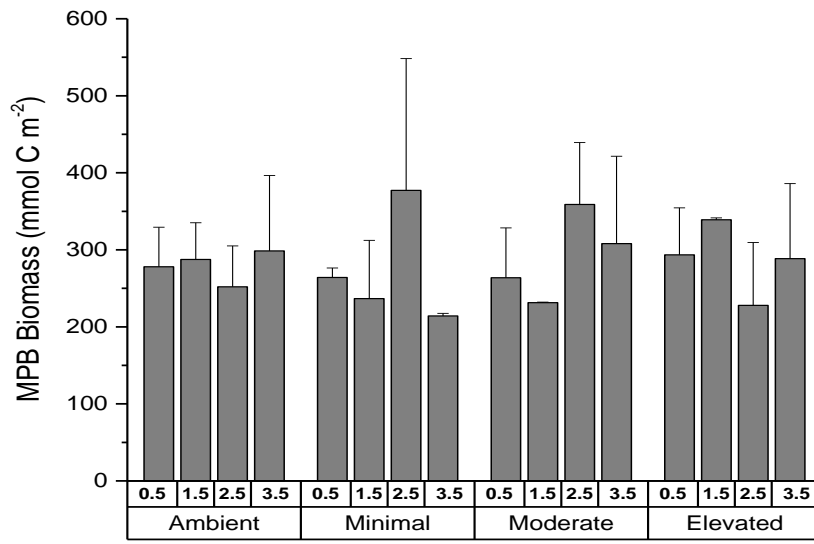

14

15 **Supplemental Figure 3:** MPB carbon biomass in 0 to 2 cm sediments calculated from  
 16 chlorophyll *a* concentrations, assuming a C:Chl-*a* ratio of 40 (mean ± SE).

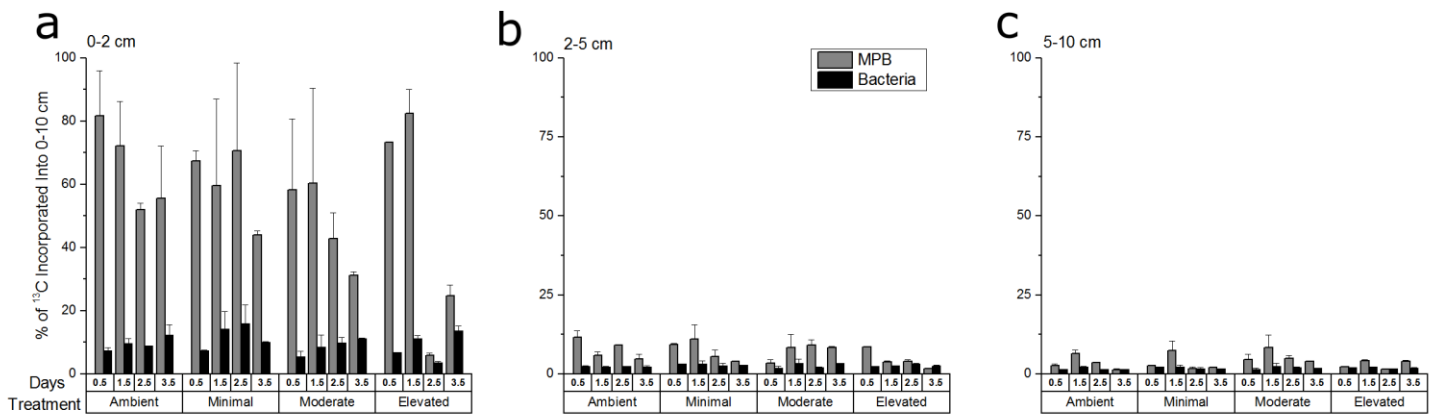

18 **Supplemental Figure 4:** Excess <sup>13</sup>C incorporation into MPB and bacterial biomass at depths a)  
 19 0-2 cm, b) 2-5 cm and c) 5-10 cm as a portion of the total <sup>13</sup>C in 0-10 cm sediment OC at each  
 20 time.

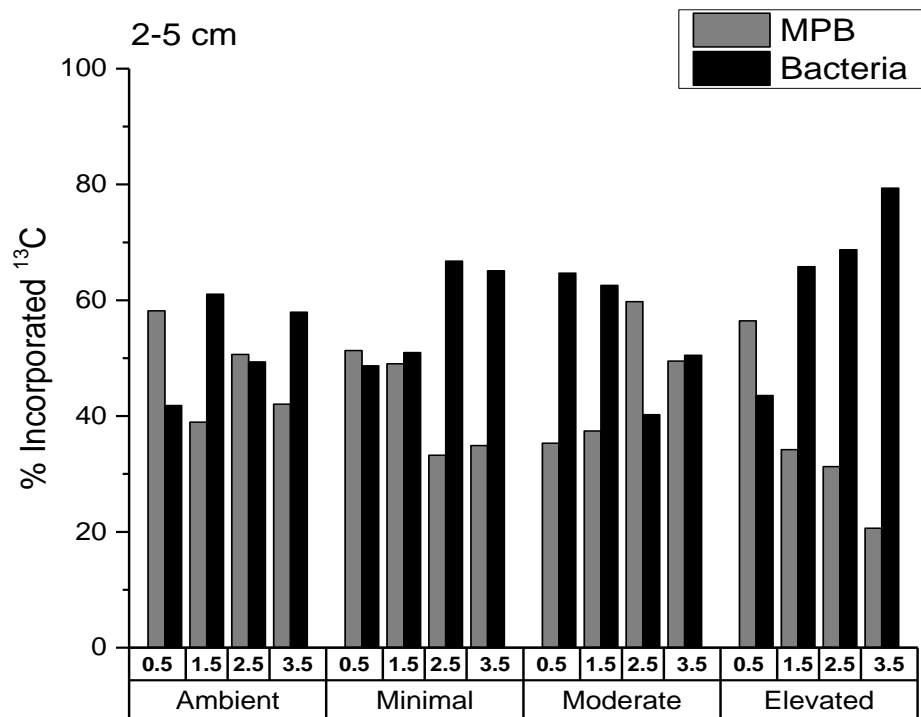

21

22 **Supplemental Figure 5:** Excess  $^{13}\text{C}$  incorporation into MPB and bacterial biomass at a depth of  
 23 2-5 cm as a percentage of the total  $^{13}\text{C}$  in microbial biomass at 2-5 cm at each time period. There  
 24 are no error bars as PLFAs were analyzed for only one replicate sample from each time period.

25

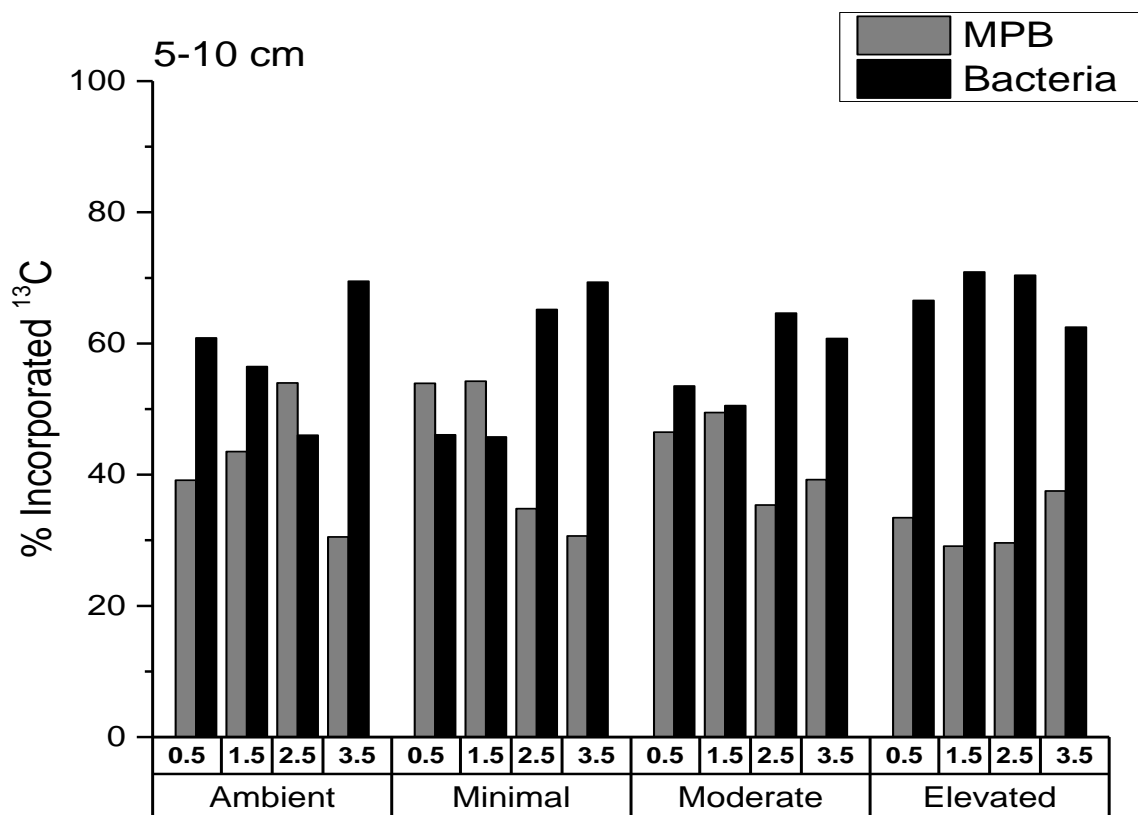

26

27 **Supplemental Figure 6:** Excess  $^{13}\text{C}$  incorporation into MPB and bacterial biomass at a depth of  
 28 5 -10 cm as a percentage of the total  $^{13}\text{C}$  in microbial biomass at 5-10 cm at each time period.  
 29 There are no error bars as PLFAs were analyzed for only one replicate sample from each time  
 30 period.
